# Supplementary material
Source: PubMed Central journal article supplement (PMC2795666)

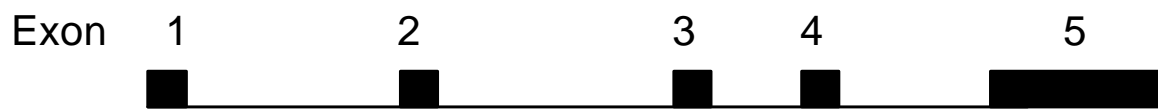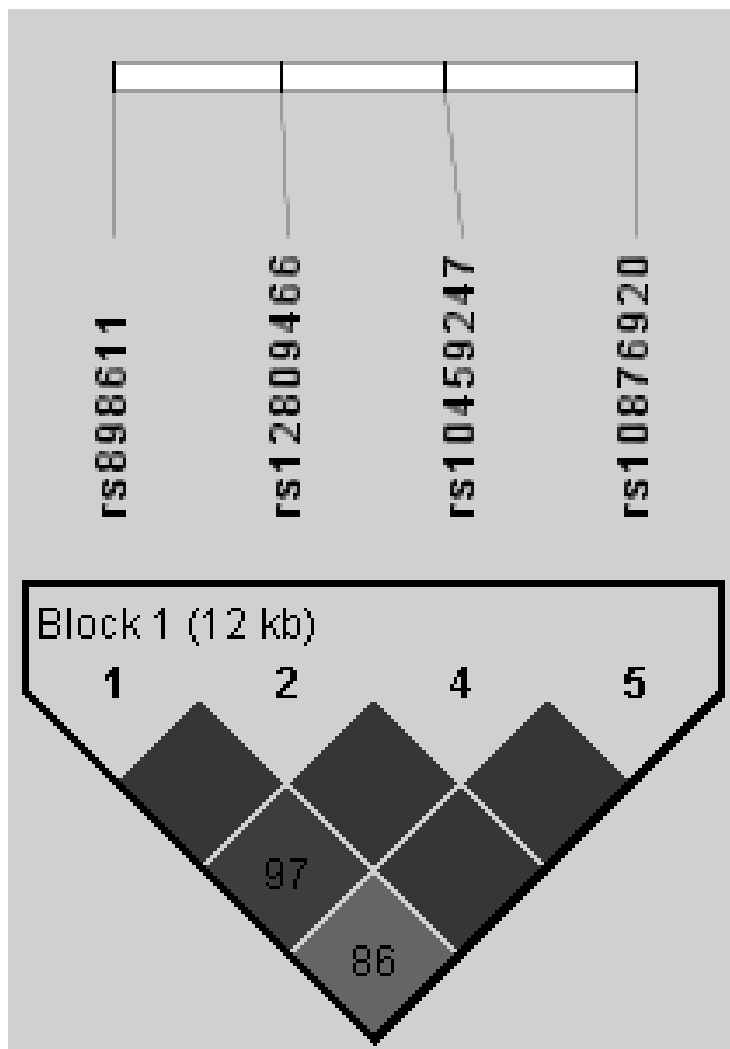

Supplement: jc.2009-0931_1.pdf [file jc.2009-0931_1.pdf]
